# Supplementary material for: Facile fabrication of a stretchable, stable, and self-adhesive poly(ionic liquid) as a flexible sensor
Source: Royal Society of Chemistry journal article supplement (doi:10.1039/d3lp00137g), 2024-01-01
Supplement: d3lp00137g1.pdf [file d3lp00137g1.pdf]

## Supporting Information

### Facile fabrication of stretchable, stable and self-adhesive poly(ionic liquid) for flexible sensor

*Jingxian Sun<sup>b</sup>, Shilu Zhou<sup>b</sup>, Zhe Zhao<sup>b</sup>, Fengfeng Zhang<sup>b</sup>, Zhongcheng Guo<sup>b</sup>, Shimin Liu<sup>b</sup>, and Yan Lu<sup>a,\*</sup>*

<sup>a</sup> State Key Laboratory of Solid Lubrication, Lanzhou Institute of Chemical Physics, Chinese Academy of Science, Lanzhou 730000, China.

<sup>b</sup> China Tobacco Shandong Industrial Co. Ltd, Jinan 250000, P. R. China.

\* Corresponding authors: [luyan@licp.cas.cn](mailto:luyan@licp.cas.cn) (Yan Lu)

### Results and discussion

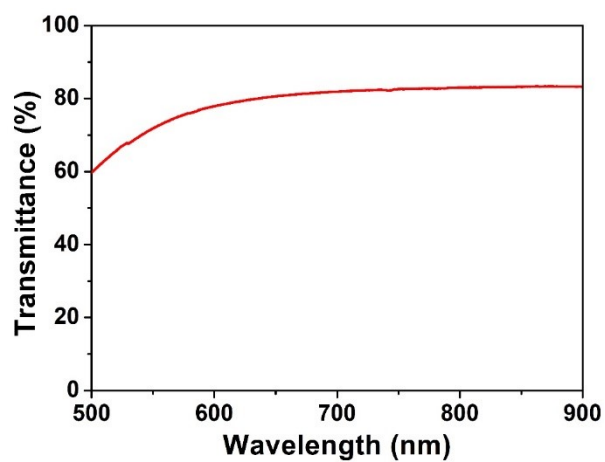

Fig. S1 Transmittance of a 1mm-thick PIL.

The transparency of the PIL was expressed by the transmittance of light in the visible range. As demonstrated in Fig. S1, the transmittance of the PIL was about 80% in the visible light range, indicating its good transparency.

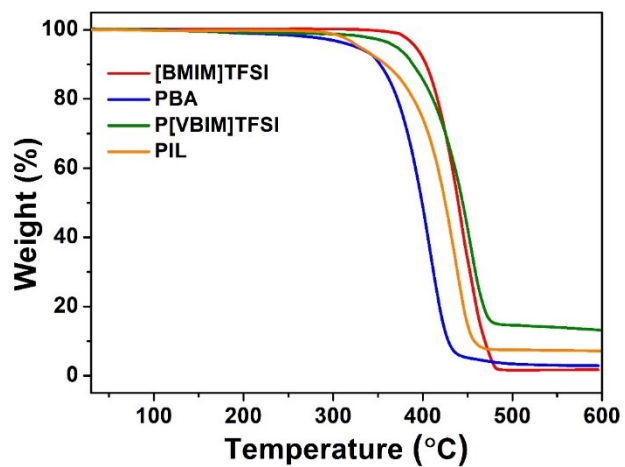

**Fig. S2** TGA curves of the individual components of the PIL
